# Supplementary material
Source: Springer Nature journal article supplement (https://www.springermedizin.de/resource/supplementary/12913_2013_2960_MOESM1_ESM.pdf/9533012)

## Diagram 1 Study Themes

Major theme - Continuum of care. Subthemes – continuity, collaboration, transition of care.  
Continuity minor themes – developing a relationship with the family, co-ordination of care, communication pathway

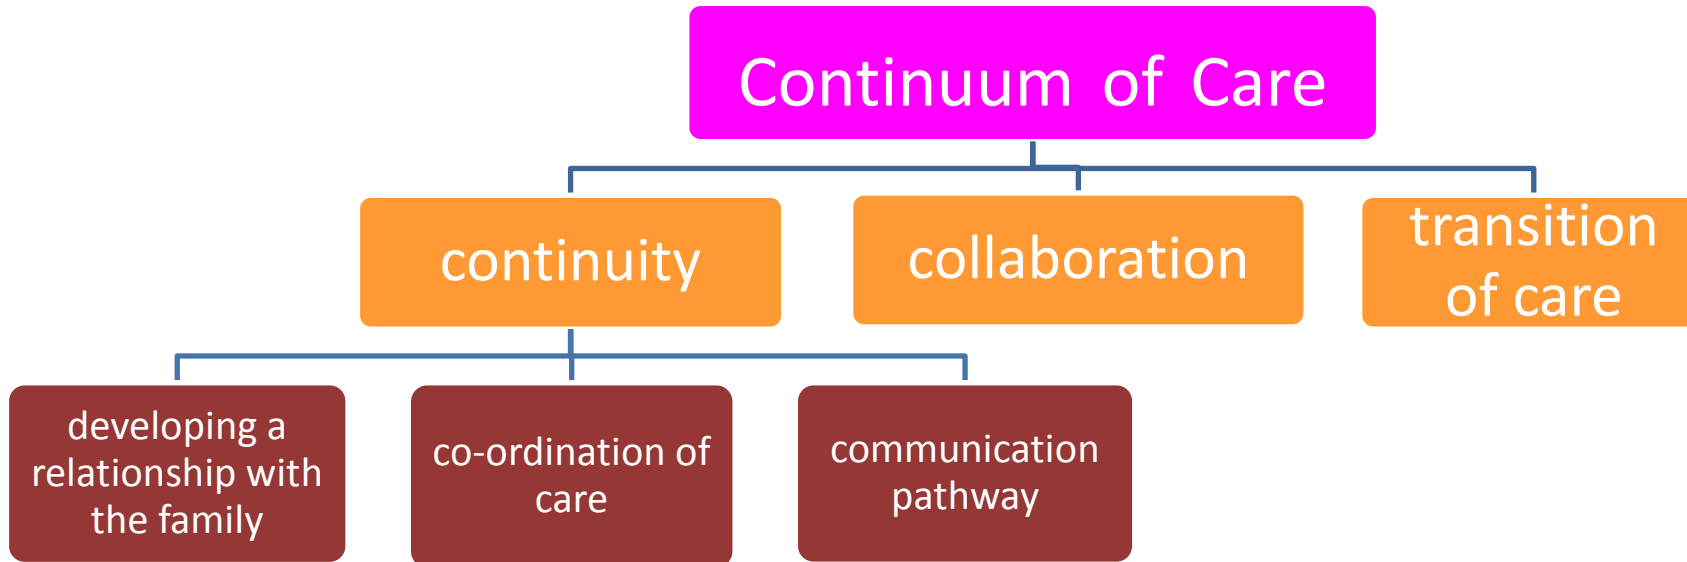

Supplement: MOESM1 [file 9533012]
